# Supplementary material
Source: publisher figshare collection journal article supplement (https://gsajournals.figshare.com/ndownloader/files/12285182)
Supplement: Supplementary file 1 [file 12285182]

## Sheet: Sheet1
File S1. SGE1 genotypes, phenotypes and metadata of wild S. cerevisiae strains used in this study.
Strain Name	Strain Synonyms	Niche	Location	Source	Avg. Rel Total Growth in 250 mM [C2C1im]Cl	SEM Rel Total Growth in 250 mM [C2C1im]Cl	Avg. Rel Total Growth in 250 mM [C2C1im]OAc	SEM Rel Total Growth in 250 mM [C2C1im]OAc	SGE1 genotype relative to S288c reference strain	Genome sequencing method	References for genome sequencing
S288c		Natural Isolate	California, USA	National Collection of Yeast Cultures	0.258921	0.0514305	0.225633	0.0860227	SLS	Multiple	Engel et al. 2014
273614N	NCYC 3457	Clinical	Newcastle, UK	National Collection of Yeast Cultures	0.725921	0.0223879	0.253482	0.0617811	PLL	Illumina	Skelly et al. 2013
378604X	NCYC 3456	Clinical	Newcastle, UK	National Collection of Yeast Cultures	0.923978	0.00849488	0.730999	0.0384995	PLL	Sanger and Illumina	This study and Skelly et al. 2013
CBS7960	DBVPG7960	Industrial fermentation (sugar cane)	Sau Paulo, Brazil	Justin Fay, University of Rochester	0.574988	0.0381497	0.261078	0.021291	SLL	Illumina	Hose et al. 2015
CLIB215		Bakery	New Zealand	Justin Fay, University of Rochester	0.301804	0.032918	0.161005	0.00692646	SLS	Sanger	This study
DBVPG1106	NCYC 3447	Natural Isolate	Australia	National Collection of Yeast Cultures	0.228942	0.00443208	0.260379	0.0614433	SLS	Illumina	Skelly et al. 2013 and Bergstrom et al. 2014
DBVPG1373	NCYC 3312	Natural Isolate	The Netherlands	National Collection of Yeast Cultures	0.17652	0.0301501	0.074555	0.00970739	SLS	Sanger and Illumina	This study, Skelly et al. 2013, and Bergstrom et al. 2014
DBVPG1788	NCYC 3311	Natural Isolate	Turku, Finland	National Collection of Yeast Cultures	0.685045	0.0898981	0.136601	0.0284281	SLL	Sanger and Illumina	This study and Bergstrom et al. 2014
DBVPG1853	NCYC 3313	Unknown	Ethiopia	National Collection of Yeast Cultures	0.750902	0.0247611	0.146074	0.023001	PLL, L297M	Illumina	Hose et al. 2015
DBVPG6044	NCYC 3469	Other Fermentation	West Africa	National Collection of Yeast Cultures	0.182377	0.0292481	0	0	PLL, S234C, V384I, K467E	Sanger and Illumina	This study, Skelly et al. 2013, and Bergstrom et al. 2014
DBVPG6765	NCYC 3264	Natural Isolate	Indonesia	National Collection of Yeast Cultures	0.289535	0.0534505	0.102164	0.0172232	SLL	Sanger and Illumina	This study, Skelly et al. 2013, and Bergstrom et al. 2014
Ethanol Red®		Industrial	Industrial	LeSaffre	0.778404	0.0966441	0.539335	0.0649364	PLL, D429E	Illumina	Hose et al. 2015
GLBRCY128		Engineered and evolved isolate of NRRL YB210		Parreiras et al., 2014, Sato et al., 2016	0.505356	0.118202	0.192664	0.0375927	PLL	Illumina	Sato et al. 2016
GLBRCY22-3		Engineered isolate of NRRL YB210		Parreiras et al., 2014, McIlwain et al., 2016	0.49582	0.00707189	0.491665	0.0109264	PLL	Illumina and PacBio	McIlwain et al. 2016
I14		Vineyard (soil)	Petina, Italy	Justin Fay, University of Rochester	0.699183	0.0109894	0.260942	0.0160069	PLL	Illumina	Hose et al. 2015
IL-01		Soil	Cahokia, IL	Justin Fay, University of Rochester	0.647591	0.250037	0.19003	0.0309559	PLL	Sanger and Illumina	This study and Hose et al. 2015
K1	Kyokai no. 1	Sake	Japan	Clete Kurtzman, USDA ARS Culture Collection	0.683806	0.076602	0.229638	0.0571396	PLL, V423A	Illumina	Hose et al. 2015
K10	Kyokai no. 10	Sake	Japan	Clete Kurtzman, USDA ARS Culture Collection	0.64396	0.0475319	0.128839	0.0120409	PLL, D429E	Illumina	Hose et al. 2015
K11	NCYC 3452, Awamori 1	Sake	Japan	National Collection of Yeast Cultures	0.174961	0.0235466	0.0859151	0.00804129	PLL, D429E	Sanger and Illumina	This study and Skelly et al. 2013
K9	Kyokai no. 9	Sake	Japan	Clete Kurtzman, USDA ARS Culture Collection	0.248128	0.0323896	0.110906	0.0110381	PLL, D429E	Illumina	Hose et al. 2015
L-1374	NCYC 3318	Wine fermentation	Maule Region, Chile	National Collection of Yeast Cultures	0.503362	0.0690811	0.210305	0.0253738	SLS	Illumina	Skelly et al. 2013 and Bergstrom et al. 2014
L-1528	NCYC 3319	Wine fermentation	Maule Region, Chile	National Collection of Yeast Cultures	0.358758	0.0700766	0.124167	0.0186619	SLL	Illumina	Bergstrom et al. 2014
M22		Vineyard	Italy	Clete Kurtzman, USDA ARS Culture Collection	0.284719	0.0285408	0.104835	0.0279414	SLS	Sanger and Illumina	This study and Hose et al. 2015
NCYC110	NCYC 3486	Other Fermentation	West Africa	National Collection of Yeast Cultures	0.158935	0.0642676	0.0564663	0.0380949	PLL, S234C, V384I, K467E	Sanger	This study
NCYC361	NCYC 3451	Wine		National Collection of Yeast Cultures	0.217446	0.0521601	0.122875	0.0353803	SLS	Sanger and Illumina	This study and Skelly et al. 2013
PW5		Other Fermentation	Aba, Nigeria	Justin Fay, University of Rochester	0.41815	0.0655065	0.351075	0.0832665	PLL, E322Q, K467E	Sanger and Illumina	This study and Hose et al. 2015
SB	S. boulardii (S. cerevisiae)	Natural Isolate	Indonesia	Clete Kurtzman, USDA ARS Culture Collection	0.169214	0.00584498	0.125352	0.00352976	SLS	Sanger and Illumina	This study and Hose et al. 2015
T73	ATCC 90607	Wine fermentation	Alicante, Spain	Justin Fay, University of Rochester	0.450573	0.0846707	0.0815585	0.011108	SLL	Illumina	Hose et al. 2015
UC5	UCD 612	Sake	Japan	Justin Fay, University of Rochester	0.287917	0.00752365	0.177262	0.0555536	PLL, V423A	Sanger and Illumina	This study and Hose et al. 2015
UWOPS03-461.4	NCYC 3461	Nectar of Bertam Palm	Malaysia	National Collection of Yeast Cultures	0.800543	0.018495	0.388724	0.0597143	PLL, N506D	Sanger and Illumina	This study and Bergstrom et al. 2014
UWOPS05-217.3	NCYC 3462	Nectar of Bertam Palm	Malaysia	National Collection of Yeast Cultures	0.787558	0.0398544	0.373616	0.0451399	PLL, N506D	Sanger and Illumina	This study and Skelly et al. 2013
UWOPS05-227.2	NCYC 3468	Bertam Palm	Malaysia	National Collection of Yeast Cultures	0.837933	0.0375155	0.479173	0.0285769	PLL, N506D	Sanger and Illumina	This study and Skelly et al. 2013
UWOPS83-787.3	NCYC 3448	Fruit of Opuntia stricta	Bahamas	National Collection of Yeast Cultures	0.389302	0.149638	0.0747488	0.0106667	PLL	Sanger and Illumina	This study, Skelly et al. 2013, and Bergstrom et al. 2014
UWOPS87-2421	NCYC 3449	Cladode of Opuntia megacantha	Hawaii	National Collection of Yeast Cultures	0.74832	0.0449327	0.178768	0.0326463	PLL, D429E	Sanger and Illumina	This study, Skelly et al. 2013, and Bergstrom et al. 2014
W303	NCYC 3467	Lab		National Collection of Yeast Cultures	0.140986	0.00349935	0.0433747	0.0273021	SLS	Sanger and Illumina	This study, Bergstrom et al. 2014 and Hose et al. 2015
WE372		Wine fermentation	Cape Town, South Africa	Justin Fay, University of Rochester	0.60043	0.0335612	0.283989	0.0219047	SLS	Illumina	Hose et al. 2015
Y2209	NRRL Y-2209	Natural Isolate	San Jacinto, California, USA	Clete Kurtzman, USDA ARS Culture Collection	0.720072	0.0585303	0.295183	0.0240548	SLL	Sanger and Illumina	This study and Hose et al. 2015
Y3	NRRL Y-1438	Wine fermentation	Africa	Clete Kurtzman, USDA ARS Culture Collection	0.300372	0.054875	0.165016	0.0222439	PLL, D429E	Illumina	Hose et al. 2015
Y389	NRRL Y-389	Natural Isolate		Clete Kurtzman, USDA ARS Culture Collection	0.86579	0.0428216	0.281046	0.0101286	PLL	Sanger and Illumina	This study and Hose et al. 2015
Y6	NRRL YB-1952	Natural Isolate	French Guiana	Clete Kurtzman, USDA ARS Culture Collection	0.786975	0.013288	0.412582	0.052393	PLL	Sanger and Illumina	This study and Hose et al. 2015
Y7568	NRRL Y-7568	Natural Isolate	Philippines	Clete Kurtzman, USDA ARS Culture Collection	0.675831	0.131651	0.315198	0.0186333	SLL	Illumina	Hose et al. 2015
YB4081	NRRL YB-4081	Natural Isolate	Philippines	Clete Kurtzman, USDA ARS Culture Collection	0.465895	0.0807787	0.169272	0.00958802	PLL, I370V	Illumina	Hose et al. 2015
YB4082	NRRL YB-4082	Natural Isolate	Philippines	Clete Kurtzman, USDA ARS Culture Collection	0.68371	0.00859511	0.251097	0.0385376	PLL, D429E	Illumina	Hose et al. 2015
YB908	NRRL YB-908	Natural Isolate		Clete Kurtzman, USDA ARS Culture Collection	0.798054	0.00724339	0.212509	0.00762378	PLL	Illumina	Hose et al. 2015
YJM189	NCYC 431	Distillery		John McCusker, Duke Unversity	0.277476	0.0855134	0.132122	0.0366325	SLL	Illumina	Strope et al. 2015
YJM195	NCYC 762	Palm wine	Nigeria	John McCusker, Duke Unversity	0.173549	0.0107077	0.100924	0.0025831	PLL, E322Q, K467E	Illumina	Strope et al. 2015
YJM244	CBS 1227	Clinical	Romania	John McCusker, Duke Unversity	0.603948	0.0187691	0.272873	0.0233122	PLL	Illumina	Strope et al. 2015
YJM248	CBS 2910	Clinical		John McCusker, Duke Unversity	0.162874	0.00965047	0.0806168	0.00729781	SLL	Illumina	Strope et al. 2015
YJM270	CBS 2807	Wine	Slovenia	John McCusker, Duke Unversity	0.108853	0.0145612	0.0800773	0.0028501	SLS	Illumina	Strope et al. 2015
YJM320	CBS 7837	Clinical	USA	John McCusker, Duke Unversity	0.455207	0.0489967	0.230527	0.0253899	PLL, D429E	Illumina	Strope et al. 2015
YJM326	CBS 7838	Clinical	USA	John McCusker, Duke Unversity	0.638745	0.0325666	0.204463	0.00536051	PLL, D429E	Illumina	Strope et al. 2015 and Hose et al. 2015
YJM339		Clinical	USA	Justin Fay, University of Rochester	0.535046	0.0606535	0.225034	0.0213472	PLL, D429E	Illumina	Hose et al. 2015
YJM421		Clinical	USA	Justin Fay, University of Rochester	0.58402	0.128871	0.238055	0.0615119	PLL, D429E	Illumina	Hose et al. 2015
YJM428	CBS 7836	Clinical	USA	John McCusker, Duke Unversity	0.192237	0.0179616	0.129069	0.00707856	PLL, D429E	Illumina	Strope et al. 2015 and Hose et al. 2015
YJM440		Clinical	USA	Justin Fay, University of Rochester	0.725644	0.021804	0.335708	0.0497836	PLL, D429E	Illumina	Hose et al. 2015
YJM450	92-123	Clinical	California, USA	John McCusker, Duke Unversity	0.581395	0.146891	0.217582	0.0289027	PLL, D429E	Illumina	Strope et al. 2015
YJM451	B70302(b)	Clinical		John McCusker, Duke Unversity	0.917284	0.0136418	0.349614	0.0396781	PLL, D429E	Illumina	Strope et al. 2015 and Hose et al. 2015
YJM453	B68019c	Clinical		John McCusker, Duke Unversity	0.299384	0.0315782	0.198136	0.0519506	SLS	Illumina	Strope et al. 2015
YJM454		Clinical	USA	Justin Fay, University of Rochester	0.655488	0.090938	0.145556	0.0226512	PLL	Illumina	Hose et al. 2015
YJM456	89-156	Clinical	California, USA	John McCusker, Duke Unversity	0.82967	0.0400021	0.15046	0.0485511	PLL	Illumina	Strope et al. 2015
YJM470	SUH	Clinical	California, USA	John McCusker, Duke Unversity	0.11311	0.00687623	0.0747583	0.00352016	PLL, D429E	Illumina	Strope et al. 2015
YJM541	SUH	Clinical	California, USA	John McCusker, Duke Unversity	0.229017	0.0275083	0.165145	0.0302703	PLL, D429E	Illumina	Strope et al. 2015
YJM554	SUH	Clinical	California, USA	John McCusker, Duke Unversity	0.27024	0.0278703	0.207623	0.0220927	PLL, D429E	Illumina	Strope et al. 2015
YJM555	SUH	Clinical	California, USA	John McCusker, Duke Unversity	0.918449	0.134425	0.348722	0.0581555	PLL, D429E	Illumina	Strope et al. 2015
YJM681	SUH	Clinical	California, USA	John McCusker, Duke Unversity	0.418823	0.0441957	0.312073	0.0574058	PLL, D429E	Illumina	Strope et al. 2015
YJM682	R87-91	Clinical	Texas, USA	John McCusker, Duke Unversity	0.576692	0.065677	0.292709	0.0290369	PLL, D429E	Illumina	Strope et al. 2015
YJM683	R93-1871	Clinical	Texas, USA	John McCusker, Duke Unversity	0.335324	0.0719265	0.350307	0.0540678	PLL, D429E	Illumina	Strope et al. 2015
YJM689	R93-1017	Clinical	Texas, USA	John McCusker, Duke Unversity	0.340919	0.0835136	0.197121	0.0112563	PLL, D429E	Illumina	Strope et al. 2015
YJM969	96-98	Clinical	Italy	John McCusker, Duke Unversity	0.383112	0.0697817	0.198455	0.0433542	SLS	Illumina	Strope et al. 2015
YJM972	96-100	Clinical	Italy	John McCusker, Duke Unversity	0.234765	0.0453641	0.0965123	0.020808	SLS	Illumina	Strope et al. 2015
YJM975	NCYC 3472	Clinical	Bergamo, Italy	National Collection of Yeast Cultures	0.508624	0.0627911	0.2086	0.0304938	SLS	Illumina	Bergstrom et al. 2014
YJM978	NCYC 3458	Clinical	Bergamo, Italy	National Collection of Yeast Cultures	0.484445	0.00312263	0.249218	0.011371	SLS	Illumina	Bergstrom et al. 2014
YJM981	NCYC 3471	Clinical	Bergamo, Italy	National Collection of Yeast Cultures	0.308969	0.0360132	0.136978	0.0190518	SLS	Sanger and Illumina	This study and Bergstrom et al. 2014
YJM984	96-112	Clinical	Italy	John McCusker, Duke Unversity	0.512944	0.0708077	0.224733	0.0392399	SLS	Illumina	Strope et al. 2015
YJM987	96-113	Clinical	Italy	John McCusker, Duke Unversity	0.399015	0.0337469	0.191323	0.0184161	SLS	Illumina	Strope et al. 2015
YJM990	96-119	Clinical	Italy	John McCusker, Duke Unversity	0.611533	0.058507	0.377517	0.0350617	SLS	Illumina	Strope et al. 2015
YJM993	96-120	Clinical	Italy	John McCusker, Duke Unversity	0.664382	0.0615891	0.331372	0.0384114	SLS	Illumina	Strope et al. 2015
YJM996	96-121	Clinical	Italy	John McCusker, Duke Unversity	0.48706	0.11456	0.259407	0.0513247	SLS	Illumina	Strope et al. 2015
YJM1078	NRRL YB-4348	Clinical	Portugal	John McCusker, Duke Unversity	0.879422	0.0157399	0.162825	0.0161148	SLL	Illumina	Strope et al. 2015
YJM1129	NRRL Y-567	Other Fermentation		John McCusker, Duke Unversity	0.440252	0.0171395	0.215796	0.0193922	SLS	Illumina	Hose et al. 2015
YJM1133	MMRL 125	Clinical	North Carolina, USA	John McCusker, Duke Unversity	0.405696	0.0949177	0.240888	0.0295231	PLL, D429E	Illumina	Strope et al. 2015
YJM1190		Clinical	Michigan, USA	John McCusker, Duke Unversity	0.272252	0.0563107	0.179512	0.0301988	PLL, V423A	Illumina	Strope et al. 2015
YJM1199		Clinical	Michigan, USA	John McCusker, Duke Unversity	0.297446	0.0459464	0.245927	0.0192221	PLL, D429E	Illumina	Strope et al. 2015
YJM1202		Clinical	Michigan, USA	John McCusker, Duke Unversity	0.381418	0.0360483	0.241477	0.0143955	PLL, D429E	Illumina	Strope et al. 2015
YJM1208	1882	Clinical	Michigan, USA	John McCusker, Duke Unversity	0.712566	0.0613049	0.279592	0.0171726	SLL	Illumina	Strope et al. 2015
YJM1242	NRRL Y-35	Fruit	Illinois, USA	John McCusker, Duke Unversity	0.437906	0.0216094	0.287674	0.0181464	SLS	Illumina	Strope et al. 2015
YJM1244	NRRL Y1532	Fruit	Indonesia	John McCusker, Duke Unversity	0.385819	0.0398336	0.219637	0.0223677	SLS	Illumina	Strope et al. 2015
YJM1248	NRRL Y-1546	Wine	West Africa	John McCusker, Duke Unversity	0.287487	0.0423074	0.136266	0.0108074	PLL, S234C, V384I, K467E	Illumina	Strope et al. 2015
YJM1250	NRRL Y-6673	Sugar cane		John McCusker, Duke Unversity	0.179081	0.058725	0.110302	0.00893283	PLL, D429E	Illumina	Strope et al. 2015
YJM1252	NRRL Y-6679	Alpechin	Spain	John McCusker, Duke Unversity	0.887338	0.00966408	0.160301	0.00383756	SLL	Illumina	Strope et al. 2015
YJM1273		Oak tree	Pennsylvania, USA	John McCusker, Duke Unversity	0.751996	0.0189816	0.169382	0.0306008	PLL	Illumina	Strope et al. 2015
YJM1304	R93-1092	Clinical	Texas, USA	John McCusker, Duke Unversity	0.279676	0.037994	0.242604	0.043167	SLS	Illumina	Strope et al. 2015
YJM1307	NRRL Y-961	Clinical	District of Columbia, USA	John McCusker, Duke Unversity	0.37117	0.114241	0.249432	0.0759104	SLL	Illumina	Strope et al. 2015
YJM1326		Clinical	Minnesota, USA	John McCusker, Duke Unversity	0.211112	0.0327137	0.142093	0.0290563	PLL, D429E	Illumina	Strope et al. 2015
YJM1332	M1-2	Wine	Italy	John McCusker, Duke Unversity	0.511937	0.0573906	0.289158	0.0286636	SLS	Illumina	Strope et al. 2015
YJM1336	M28s2	Wine	Italy	John McCusker, Duke Unversity	0.421246	0.120327	0.198906	0.0743337	SLS	Illumina	Strope et al. 2015
YJM1338	NRRL Y-963	Sour fig	Maryland, USA	John McCusker, Duke Unversity	0.749926	0.00919006	0.2101	0.00196061	PLL	Illumina	Strope et al. 2015
YJM1341	NRRL Y-12637	Wine	South Africa	John McCusker, Duke Unversity	0.446759	0.0306976	0.209145	0.0133649	SLS	Illumina	Strope et al. 2015
YJM1342	NRRL Y-12638	Soil	South Africa	John McCusker, Duke Unversity	0.808031	0.0425821	0.121174	0.0459887	PLL, P253A	Illumina	Strope et al. 2015
YJM1356	NRRL Y-747	Cider		John McCusker, Duke Unversity	0.250233	0.0259292	0.143527	0.0117755	SLS	Illumina	Strope et al. 2015
YJM1381	NRRL YB-427	Rum fermentation	Trinidad	John McCusker, Duke Unversity	0.488567	0.0395174	0.171265	0.0267171	SLL	Illumina	Strope et al. 2015
YJM1383	NRRL Y-5511	Coconut	Philippines	John McCusker, Duke Unversity	0.157748	0.0348949	0.1095	0.0313113	SLL	Illumina	Strope et al. 2015
YJM1386	NRRL Y-11878	Sugar cane	Jamaica	John McCusker, Duke Unversity	0.284448	0.0639186	0	0	PLL, D429E	Illumina	Strope et al. 2015
YJM1387	NRRL Y-12758	Wine	Japan	John McCusker, Duke Unversity	0.346616	0.0365515	0.147189	0.00537512	SLS	Illumina	Strope et al. 2015
YJM1388	NRRL Y-12769	Fermented tapioca	Malayasia	John McCusker, Duke Unversity	0.127884	0.0193737	0.0834173	0.00339104	PLL, D429E	Illumina	Strope et al. 2015
YJM1389	NRRL Y-17447	Sewage	Thailand	John McCusker, Duke Unversity	0.673958	0.0927647	0.196748	0.0476806	PLL, D429E	Illumina	Strope et al. 2015
YJM1399	NRRL YB-908	Wild cherry tree gum		John McCusker, Duke Unversity	0.836102	0.00792211	0.167017	0.00762388	PLL	Illumina	Strope et al. 2015
YJM1400	NRRL YB-4081	Guava	Philippines	John McCusker, Duke Unversity	0.57402	0.078924	0.143692	0.0100846	PLL, I370V	Illumina	Strope et al. 2015
YJM1401	NRRL YB-4082	Papaya	Philippines	John McCusker, Duke Unversity	0.718656	0.0111067	0.338967	0.0520835	PLL, D429E	Illumina	Strope et al. 2015
YJM1402	NRRL YB-4449	Grape vine		John McCusker, Duke Unversity	0.597142	0.065014	0.176173	0.0177923	PLL, S213N	Illumina	Strope et al. 2015
YJM1415	NRRL Y-268	Wine	France	John McCusker, Duke Unversity	0.574237	0.0480013	0.309873	0.021378	SLS	Illumina	Strope et al. 2015
YJM1417	NRRL YB-2541		Hawaii, USA	John McCusker, Duke Unversity	0.319616	0.0305715	0.197708	0.0246611	SLS	Illumina	Strope et al. 2015
YJM1418	NRRL YB-4506	Oak tree	Japan	John McCusker, Duke Unversity	0.293093	0.0739799	0.147175	0.0305638	PLL	Illumina	Strope et al. 2015
YJM1419	NRRL YB-2625	Bagasse		John McCusker, Duke Unversity	0.19828	0.0358885	0.17974	0.0484221	PLL, D429E	Illumina	Strope et al. 2015
YJM1433		Wine	France	John McCusker, Duke Unversity	0.179016	0.0251764	0.158664	0.0105061	SLS	Illumina	Strope et al. 2015
YJM1434		Oak	Pennsylvania, USA	John McCusker, Duke Unversity	0.809719	0.0112528	0.199416	0.0425377	PLL	Illumina	Strope et al. 2015
YJM1439		Ginger beer	West Africa	John McCusker, Duke Unversity	0.220573	0.0362265	0.0923133	0.0037874	PLL, S234C, V384I, K467E	Illumina	Strope et al. 2015
YJM1443		Fruit	Bahamas	John McCusker, Duke Unversity	0.69485	0.108852	0.204978	0.0650507	PLL	Illumina	Strope et al. 2015
YJM1444		Cladode	Hawaii, USA	John McCusker, Duke Unversity	0.766269	0.0286531	0.184767	0.00657241	PLL, D429E	Illumina	Strope et al. 2015
YJM1463		White Tecc	Ethiopia	John McCusker, Duke Unversity	0.74339	0.0932322	0.111855	0.006427	PLL, L297M	Illumina	Strope et al. 2015
YJM1477	NRRL Y-581	Blatz beer	Missouri, USA	John McCusker, Duke Unversity	0.59861	0.00758434	0.264491	0.00737514	SLS	Illumina	Strope et al. 2015
YJM1478	NRRL Y-1890	Kefir		John McCusker, Duke Unversity	0.223279	0.0401869	0.148924	0.0139137	PLL, V423A	Illumina	Strope et al. 2015
YJM1479	NRRL Y-6297	Coconut tuba	Phillipines	John McCusker, Duke Unversity	0.35595	0.0420849	0.10455	0.00211046	PLL, I370V	Illumina	Strope et al. 2015
YJM1526	Phaff 74-29	Clinical (throat)		John McCusker, Duke Unversity	0.589984	0.128089	0.254504	0.0387655	SLS	Illumina	Strope et al. 2015
YJM1527	Phaff 05-780	Prune	Winters, California, USA	John McCusker, Duke Unversity	0.742147	0.0344108	0.206792	0.0272938	PLL	Illumina	Strope et al. 2015
YJM1573	NRRL Y-12603	Fermented food	India	John McCusker, Duke Unversity	0.352835	0.10088	0.105207	0.0182256	PLL, S213N	Illumina	Strope et al. 2015
YJM1574		Wine		John McCusker, Duke Unversity	0.859254	0.0630412	0.165175	0.0130943	SLL	Illumina	Strope et al. 2015
YJM1592	NRRL Y-12603	Sewage	Thailand	John McCusker, Duke Unversity	0.798663	0.0132292	0.122101	0.00189118	PLL, D429E	Illumina	Strope et al. 2015
YJM1615		Clinical	California, USA	John McCusker, Duke Unversity	0.292672	0.0128114	0.102972	0.00711921	PLL, D429E	Illumina	Strope et al. 2015
YPS128	NCYC 3284	Natural Isolate	Pennsylvania, USA	National Collection of Yeast Cultures	0.874114	0.0325229	0.289961	0.0554256	PLL	Sanger and Illumina	This study and Bergstrom et al. 2014
YPS163		Oak	Pennsylvania, USA	Clete Kurtzman, USDA ARS Culture Collection	0.839846	0.00413939	0.237428	0.0471865	PLL	Illumina	Hose et al. 2015
YPS606	NCYC 3315	Natural Isolate	Woodland, PA	National Collection of Yeast Cultures	0.888637	0.0122543	0.191203	0.0520178	PLL	Sanger and Illumina	Skelly et al. 2013
YPS1000		Oak	Mettlers Woods, New Jersey, USA	Clete Kurtzman, USDA ARS Culture Collection	0.750252	0.0801562	0.300151	0.120116	PLL	Illumina	Hose et al. 2015
YPS1009		Oak	Mettlers Woods, New Jersey, USA	Clete Kurtzman, USDA ARS Culture Collection	0.485816	0.321816	0.160032	0.0648325	PLL, S213N	Illumina	Hose et al. 2015
YS2	NCYC 3487	Bakery	Australia	National Collection of Yeast Cultures	0.614676	0.106518	0.123599	0.0228231	SLS	Illumina	Skelly et al. 2013
YS9	NCYC 3454	Bakery	Singapore	National Collection of Yeast Cultures	0.575304	0.0385218	0.235975	0.0374173	PLL	Sanger and Illumina	This study and Skelly et al. 2013
References
Engel SR et al. 2014 The reference genome sequence of Saccharomyces cerevisiae: then and now. G3 (Bethesda) 4: 389-398.
Skelly DA et al. 2013 Integrative phenomics reveals insight into the structure of phenotypic diversity in budding yeast. Genome Res 23: 1496-1504.
Hose J et al. 2015 Dosage compensation can buffer copy-number variation in wild yeast. Elife 4.
Bergstrom A et al. 2014 A high-definition view of functional genetic variation from natural yeast genomes. Mol Biol Evol 31: 872-888.
Sato TK et al. 2016 Directed Evolution Reveals Unexpected Epistatic Interactions That Alter Metabolic Regulation and Enable Anaerobic Xylose Use by Saccharomyces cerevisiae. PLoS Genet 12: e1006372.
McIlwain SJ et al. 2016 Genome Sequence and Analysis of a Stress-Tolerant, Wild-Derived Strain of Saccharomyces cerevisiae Used in Biofuels Research. G3 (Bethesda) 6: 1757-1766.
Strope PK et al. 2015 The 100-genomes strains, an S. cerevisiae resource that illuminates its natural phenotypic and genotypic variation and emergence as an opportunistic pathogen. Genome Res 25: 762-774.
